## **Age structuring and spatial heterogeneity in prion protein gene (*PRNP*) polymorphism in white-tailed deer**

Tyler K. Chafin<sup>1</sup>, Marlis R. Douglas<sup>1</sup>, Bradley T. Martin<sup>1</sup>, Zachery D. Zbinden<sup>1</sup>, Christopher R. Middaugh<sup>2</sup>, Jennifer R. Ballard<sup>2</sup>, M. Cory Gray<sup>2</sup>, Don White Jr.<sup>3</sup>, Michael E. Douglas<sup>1</sup>,

<sup>1</sup>Department of Biological Sciences, University of Arkansas, Fayetteville, Arkansas 72701, USA; Email: (TKC) tkchafin@uark.edu; (BTM) btm002@uark.edu; (ZDZ) zdzbinde@uark.edu; (MED) med1@uark.edu; (MRD) mrd1@uark.edu

<sup>2</sup>Arkansas Game and Fish Commission, Research, Evaluation, and Compliance Division, Little Rock, Arkansas 72205, USA; Email: (CRM) christopher.middaugh@agfc.ar.gov; (JRB) jennifer.ballard@agfc.ar.gov; (MCG) cory.gray@agfc.ar.gov

<sup>3</sup>University of Arkansas Agricultural Experiment Station, Monticello, Arkansas 71656, USA; Email: whited@uamont.edu

Running head: *PRNP polymorphism in white-tailed deer in Arkansas*

## ABSTRACT

2 Chronic-wasting disease (CWD) is a prion-derived fatal neurodegenerative disease that has  
affected wild cervid populations on a global scale. Susceptibility has been linked unambiguously  
4 to several amino acid variants within the prion protein gene (*PRNP*). Quantifying their  
distribution across landscapes can provide critical information for agencies attempting to  
6 adaptively manage CWD. Here we attempt to further define management implications of *PRNP*  
polymorphism by quantifying the contemporary geographic distribution (i.e., phylogeography) of  
8 *PRNP* variants in hunter-harvested white-tailed deer (WTD; *Odocoileus virginianus*, N=1433)  
distributed across Arkansas (USA), including a focal spot for CWD since detection of the disease  
10 in February 2016. Of these, *PRNP* variants associated with the well-characterized 96S non-  
synonymous substitution showed a significant increase in relative frequency among older CWD-  
12 positive cohorts. We interpreted this pattern as reflective of a longer life expectancy for 96S  
genotypes in a CWD-endemic region, suggesting either decreased probabilities of infection or  
14 reduced disease progression. Other variants showing statistical signatures of potential increased  
susceptibility, however, seemingly do so as an artefact of population structure. We also showed  
16 marked heterogeneity across the landscape in the prevalence of ‘reduced susceptibility’  
genotypes. This may indicate, in turn, that differences in disease susceptibility among WTD in  
18 Arkansas are an innate, population-level characteristic that is detectable through  
phylogeographic analysis.

20

**KEYWORDS** Adaptive management; chronic-wasting disease; demography; disease

22 susceptibility; haplotype; selection; white-tailed deer

## 24 **Introduction**

Chronic wasting disease (CWD) is a fatal neurodegenerative disorder that affects white-tailed  
26 deer (WTD; *Odocoileus virginianus*) and related cervids<sup>1,2</sup>, with severe impacts on native  
wildlife, that also reverberate economically for recreational hunting and ancillary commercial  
28 enterprises<sup>3,4</sup>. Most CWD eradication efforts have proven unsuccessful thus far<sup>5</sup>, leading to its  
continued spread and increased prevalence<sup>6</sup>. Given this, wildlife managers in many jurisdictions  
30 are responding by shifting long-term goals away from eradication and instead towards  
suppression, containment, and mitigation<sup>7,8</sup>.

32 Several factors have impeded the eradication of CWD, including aspects of life history in  
both host and agent, as well as limited knowledge with regards to how these interact with  
34 environment to define CWD epidemiology. Pathogenicity and transmission, for example, occur  
via the structural transformation of a naturally occurring cellular prion protein (*PrP<sup>C</sup>*) into a  
36 misfolded “pathogenic” isoform (*PrP<sup>SC</sup>*)<sup>9</sup>. The efficiency with which this occurs, coupled with  
an extensive incubation period<sup>10</sup>, serve to confound proactive surveillance and management.  
38 Additionally, both vertical<sup>11,12</sup> and horizontal transmission<sup>13,14</sup> are seemingly involved, with  
prion persistence well established within “environmental reservoirs”<sup>15–17</sup>. As a result,  
40 surveillance and monitoring are being increasingly used by state agencies to inform harvest and  
selective-removal based management strategies to suppress the disease where it cannot be  
42 eradicated<sup>18,19</sup>. This is complicated particularly due to a potential for long-distance host  
dispersal<sup>20–22</sup>, and prion ‘shedding’ by individuals with subclinical infections<sup>23,24</sup>.

44 Environmental factors that act to reduce disease spread are of particular interest. For  
example, the capacity of soil as a reservoir for extra-corporeal prion persistence may hinge upon  
46 its composition<sup>25</sup>. Likewise, environmental factors that enhance the potential for WTD

48 movements also may modulate CWD transmission among herds<sup>26,27</sup>. Considerable effort to date  
has focused on characterizing intrinsic susceptibility, especially with regard to the quantification  
of genetic polymorphisms that encode  $PrP^C$  (*PRNP*)<sup>28-31</sup>. One consistent approach is to identify  
50 those *PRNP* gene variants that are associated with reduced CWD susceptibility<sup>32,33</sup>. The amino  
acid composition of the resulting protein is thus assumed to impact disease progression<sup>34</sup>,  
52 although the exact mechanism remains unclear.

Consistent among those variants reported to be associated with reduced CWD  
54 susceptibility is a non-synonymous mutation corresponding to an amino acid substitution at  
position 96 (i.e., from glycine to serine; hereafter 96G versus 96S). Inoculation studies  
56 employing this mutation have successfully delayed the progression of CWD in both WTD and  
proxies<sup>13,35</sup>. Our primary interest is to characterize if (and how) these *PRNP* alleles vary  
58 spatially<sup>30,36</sup>, as one landscape-level axis that depicts a “resistance” to CWD spread. We provide  
such an analysis by employing WTD sampled state-wide as a basis for the phylogeography of the  
60 *PRNP* gene (i.e., the geographic distribution of individuals associated with a gene genealogy<sup>37</sup>).  
We then examine spatial and age-structured patterns within this phylogeographic framework to  
62 ask several questions regarding the role of *PRNP* variants on population dynamics in CWD-  
endemic areas: Do ‘reduced susceptibility’ variants have an effect on survivorship (e.g., as one  
64 might expect if *PRNP* polymorphisms do indeed drive susceptibility)? If so, does this leave a  
*detectable* signature of biased fitness (e.g., as a result of increased survivability and thus  
66 potential reproductive output)? What are the impacts of *PRNP* polymorphism on population  
demographics? We address these questions at two spatial scales: 1) within a dense sampling of  
68 the CWD-focal area (Newton County, Arkansas) from which prevalence, and, presumably,  
measurable impacts on population demography are highest; and 2) state-wide, where sampling

70 densities were lower, and in many areas within which CWD has not yet been detected (though  
we note that lack of detection does not mean lack of occurrence). The county-level spatial scale  
72 allowed us to examine demographic impacts within a recently detected outbreak in a novel area  
(Newton County), wherein dense sampling and high prevalence allow sufficient sampling for  
74 testing hypotheses of age structuring and selection on *PRNP* polymorphisms, while the state-  
level spatial scale allowed broad-scale analyses of heterogeneity and phylogeographic  
76 structuring. The combination of these two spatial scales allows for superimposing differential  
susceptibilities and fitness across a CWD-absent landscape which could in turn facilitate the  
78 creation of management scenarios to project and potentially mitigate disease spread.

## 80 **Results**

### *Data generation*

82 From 2016-2019, ear and tongue tissue samples were collected from 1,720 harvested WTD  
across 75 counties in Arkansas (Supplemental Table 1; Figure 1). Subsequently, tissue samples  
84 from 1,460 WTD were amplified and sequenced, yielding ~800 nucleotides of the *PRNP* gene  
and *PRNP*<sup>psg</sup> pseudogene. From these data we obtained 1,433 sequences, of which 316 were  
86 obtained from Newton County, the CWD focal area. Sequences were trimmed to 720  
unambiguously scored nucleotides, with 11 sites found to be polymorphic (Table 1). Three  
88 previously reported polymorphic sites (i.e., nt285, nt299 and nt372; Brandt et al., 2015, 2018)  
were found to be invariable in our data, whereas one additional site had a novel synonymous  
90 substitution (nt499, A/C). Three sites (i.e., nt286, nt367 and nt676) also reflected non-  
synonymous substitutions, corresponding to amino acid substitutions 96S, 122T and 255K,  
92 respectively.

Haplotype phasing resulted in 20 distinct alleles (Table 1; Figure 2), 4 of which are  
94 novel, and 16 were previously documented in other states<sup>29-31</sup>. Two Arkansas haplotypes (AR 2  
and AR 3) share the synonymous substitution 96S (nt286/A) associated with reduced CWD  
96 susceptibility (i.e., Haplotype C<sup>30</sup>). Three others (I, P and V) also share the 96S amino acid  
alteration (Table 1; Figure 2). However, all five were at low frequencies (<1%, except Haplotype  
98 I at 1.47%; Table 2), and thus were excluded from tests of CWD association.

Targeted amplification and sequencing of the *PRNP*<sup>PSG</sup> pseudogene was successful in  
100 30% of our samples (443 of 1,459). Our comparison of the 443 *PRNP* and *PRNP*<sup>PSG</sup> haplotypes  
indicated that variability at site nt413 did not represent a biological variant of the *PRNP* gene but  
102 was instead a non-targeted amplification of the *PRNP*<sup>PSG</sup> pseudogene.

#### 104 *PRNP* haplotype frequencies

Haplotype frequencies (Tables 2 and S2) differed slightly from those reported in other states  
106 (e.g., Wisconsin and Illinois<sup>30,31</sup>). The four most frequent haplotypes in Illinois and Wisconsin  
(i.e., <10%), were also common among Arkansas samples (Figure 3; Haplotypes A-D). We also  
108 found that Haplotype A, most common in Illinois/Wisconsin at 30%, occurred in only 15% of  
our samples (Figure 3; Table 2). Haplotypes B and D were instead most common in our data  
110 (each at ~23%). Haplotype C, associated with reduced CWD susceptibility, was detected at a  
frequency of 15%, quite similar to that in Illinois/Wisconsin (17%). Two additional haplotypes  
112 (E and G) also occurred at high frequencies in Arkansas (7% and 11%, respectively), whereas  
they were found at <5% in the Illinois/Wisconsin<sup>30</sup>. Out of the 16 rare haplotypes with  
114 previously reported frequencies  $\leq 1\%$  (Haplotypes K-Z<sup>30</sup>), seven were also observed at low  
frequencies in Arkansas (i.e., Haplotypes K, L, O, P, R, T, and V). Haplotype frequencies also

116 differed across counties (Supplemental Table 1), although we note that sampling effort was  
uneven across the state.

118

### ***Evidence for disease-mediated selection on PRNP variants***

120 Haplotypes B and C did not occur in the same frequency within CWD-positive ( $N = 432$ ) and  
CWD-negative deer ( $N = 196$ ; Table 2; Figure 3). Haplotype B was over-represented within  
122 CWD-positive deer, both state-wide (OR = 2.00,  $p = 0.000001$ ), and in Newton County (OR =  
1.43,  $p = 0.033$ ). Haplotype C was under-represented within CWD-positive deer, both state-wide  
124 (OR = 0.30,  $p = 0.00003$ ) and Newton County (OR = 0.42,  $p = 0.015$ ).

If Haplotypes B and C influence CWD susceptibility, then their relative frequency of  
126 occurrence should vary among deer age-classes, reflecting a biased probability of reaching older  
age classes. We restricted our analyses to Newton County to ensure only deer from CWD-  
128 endemic locations were considered. We found the frequency of Haplotype C significantly more  
common in older deer, both when measured as relative allele frequency ( $p=0.036$ ;  $R^2=0.635$ ;  
130 Figure 4), and as an age-partitioned odds ratio ( $p=0.043$ ;  $R^2=0.601$ ; Figure 5). The increase in  
Haplotype C remained substantial even when we considered only the relative frequency of each  
132 haplotype among CWD-positive deer from Newton County (i.e., 4% of yearling/ fawn  
haplotypes, and 17% of those from individuals older than 5; Supplemental Table 3). Among  
134 CWD-positive deer state-wide, Haplotype C was recorded at 5.24% of all sampled haplotypes  
(Table 2). By contrast, Haplotype B showed neither a discernible relationship regarding CWD  
136 status, nor relative frequencies across age classes (Figure 5; Supplemental Table 3).

Given the presence of age-structuring in Haplotype C, we then hypothesized a fitness  
138 differential associated with polymorphism at AA position 96. We first examined phylogenetic

conservation and stability of non-synonymous mutations in Arkansas (Table 1) and predicted  
140 subsequent effects on tertiary protein structure. We found the 96S substitution to be the least  
conserved of the three amino acid positions, with none of the observed substitutions significantly  
142 altering tertiary shape (Supplemental Table 3). We thus hypothesized that positive selection on  
96S was driving the observed patterns. As a test, we treated cohorts in Newton County as a time-  
144 series and computed the magnitude of selection required to generate the observed positive  
growth in frequency with increasing age (Figure 5). Our results yielded a selection coefficient ( $s$ )  
146 of 0.1215. We note that numerous caveats are associated with population genetic assumptions  
behind this calculation, as well as of the interpretation of selection coefficients<sup>38</sup>, the result  
148 seemingly supports our observations.

## 150 **Discussion**

Our diagnosis of variability in the *PRNP* gene across 1,433 WTD collected from 75 counties in  
152 Arkansas was comparable to that found in other states (Tables 1-2). Of the 20 haplotypes we  
detected, 16 were previously identified in other states, with those alleles at higher frequencies in  
154 Arkansas also being most common elsewhere<sup>30</sup>. Four novel variants were found at low  
frequencies (Table 2; Figure 2-3), with paralog artefacts as a source of this variation eliminated  
156 due to our sequencing of the pseudogene. Haplotype C, characterized by the 96S substitution,  
showed a significantly biased representation among CWD-positive deer, being under-represented  
158 in younger deer and over-represented in older CWD-positive deer (Figure 5). This suggests that  
96S-individuals tend to live longer following CWD-infection than those with alternate  
160 genotypes. This could reflect either a reduced likelihood of contracting the disease or a slower  
disease progression following exposure.



162 We also found Haplotype B as significantly over-represented in CWD-positive deer  
(Table 2 and Figure 3) but failed to find a reciprocal impact on life expectancy (Figure 5).  
164 Instead, we found Haplotype B to be most extensive within the region where CWD is currently  
centered (Figure 4). This, in turn, may suggest heterogeneity in Haplotype B frequency  
166 represents an artefact of population structure, a well-known confounding variable recognized in  
trait-association studies<sup>39-42</sup>. We also note that decreased precision of aging of white-tailed deer  
168 on the basis of tooth development and wear patterns may also contribute some variability,  
particularly with regard to haplotype frequencies among older cohorts<sup>43-45</sup>. We also cannot rule  
170 out the potential for linked variation as influencing the observed pattern in Haplotype B,  
however our results do not find any evidence for increased susceptibility of the variant. Using  
172 panels of nuclear markers, we suggest further study of patterns of spatial connectivity and  
population structure in wild WTD<sup>46</sup> as a means of separating potential spatial and  
174 phylogeographic drivers of haplotype frequencies from those driven by disease-mediated  
selection.

176

### ***Management implications of PRNP variation***

178 Structural variants of the *PrP* protein play a role in disease progression<sup>28,34</sup>. However, the exact  
mechanisms remain poorly understood. The primary variant we have implicated herein (i.e., 96S)  
180 as influencing disease susceptibility has been supported as such in laboratory settings. For  
example, Mathiason et al.<sup>23</sup> inoculated WTD with prion strains and examined time-to-detection  
182 (via saliva) across deer in multiple cohorts. Several infected individuals having the 96S prion  
gene variant remained undetected at 18 months post-inoculation, although this may represent an  
184 insufficient time for the necessary *in vivo* prion protein build-up. Race et al.<sup>35</sup> similarly

inoculated transgenic mice expressing different white-tailed deer 96GG and 96SS *PRNP*  
186 genotypes and showed that this delay in disease progression also extended to heterozygotes  
(96GS genotype).

188 Despite compelling evidence for an inhibitory mechanism at the 96S allele, its use as a  
management tool remains unclear. Genetically-guided selective breeding in domestic sheep  
190 (*Ovis aries*) has reduced scrapie incidence<sup>47,48</sup>. In a captive setting such an approach may be  
viable for WTD<sup>35</sup>, although we note that the degree of protection offered by the 96S genotype to  
192 CWD is likely much lower than that seen among the most ‘protective’ genetic variants to scrapie  
in sheep<sup>47</sup>. However, captive deer maintained at high density and under genetic selection could  
194 also drive artificial selection for emergent prion strains with heightened pathogenicity in 96S  
deer, as well as potentially expanding the host range to include novel species<sup>49</sup>.

196 The implication of 96S frequency with regard to the spread of CWD within and among  
herds is likewise uncertain. An important question is whether the potential for an increased  
198 incubation period<sup>50</sup> associated with 96S could also produce a similar extended period for  
asymptomatic and subclinical transmission/prion shedding<sup>24,51</sup>. If so, this could increase the  
200 probability of transmission by 96S deer, thus promoting its increase within populations (Figure  
6). An understanding of the of prion growth kinetics across host genotypes is needed, as well as a  
202 more thorough understanding of prion strain evolution<sup>52</sup>.

## 204 **Conclusion**

Our results corroborate previous research conducted with WTD in Illinois and Wisconsin:  
206 reduced CWD susceptibility in *PRNP* variants associated with the non-synonymous 96S  
mutation<sup>30,31</sup>. We demonstrated that a common haplotype (Haplotype C) harboring 96S increased

208 in relative frequency when older CWD-positive cohorts were examined.

Management implications of this research requires further epidemiological understanding  
210 necessary to predict outcomes (Figure 6). The next step in understanding the current distribution  
and future spread of CWD in Arkansas requires the characterization of context-specific factors,  
212 including 1) population structure as a potential driver of *PRNP* trends, 2) landscape features that  
modulate deer dispersal, population demography, and density, and 3) increased knowledge of  
214 epidemiology, including the interactions among context-specific factors<sup>53</sup>. We thus advocate for  
a landscape genomic framework for WTD as the next logical step to characterize CWD spread  
216 such that fine-scaled deer movement patterns can be more effectively parsed and interpreted<sup>54</sup>.

## 218 **Materials and Methods**

### *CWD surveillance and prevalence in Arkansas*

220 In October 2015, CWD was initially detected in Arkansas in a 2.5-year old female elk (*Cervus*  
*canadensis*) legally harvested near Pruitt in Newton County. In February 2016, a CWD-positive  
222 female WTD was found dead in Ponca in Newton County. During March 2016, biologists from  
the Arkansas Game and Fish Commission (AGFC) collected 266 WTD tissue samples within a  
224 50,500 ha focal region. CWD prevalence was 23% and differed by gender (female = 20%, male  
= 32%). For these surveys, to include the samples collected for molecular work, aging of deer  
226 was done by examination of tooth replacement and wear<sup>55</sup>.

Subsequent state-wide monitoring, which included hunter-harvested and road-killed deer,  
228 identified CWD-positive individuals outside of the initial focal region. Additional state-wide  
sampling efforts, in conjunction with hunter harvested and bi-annual surveys, established a state-  
230 wide baseline for occurrence of CWD. As of April 2020, 818 WTD and 23 elk have tested

positive for CWD. Given the incidence of confirmed CWD-positive deer, AGFC established a  
232 CWD Management Zone (CWDMZ) that included counties within a 16km radius of identified  
positives. At the completion of this study (June 2019), the CWDMZ encompassed 19 counties of  
234 northwestern Arkansas (Figure 1).

There has been a concerted effort by the AGFC to proactively manage CWD prevalence  
236 and potential disease spread in Arkansas, which included hunting regulations that promote  
harvest of young male deer and increased harvest of female deer (e.g., removal of antler point  
238 restrictions and altered bag limits). Additional restrictions included prohibiting baiting and feeding  
to reduce grouping behavior in deer and to hinder human-mediated transmission via hunting and  
240 subsequent removal of carcasses from within the CWDMZ. The CWDMZ has subsequently been  
expanded to encompass the known distribution of CWD. During the 2018/2019 deer and elk  
242 hunting seasons, 246 additional CWD-positive cervids (241 WTD and five elk) were detected.  
Moreover, the AGFC has mandated a compulsory testing requirement for harvested elk, and a  
244 voluntary test for WTD, facilitated by a state-wide network of deer head drop-off locations.

#### 246 ***DNA Extraction and amplification***

Frozen ear or tongue tissue was homogenized with the TissueLyser II (QIAGEN<sup>®</sup> Corporation,  
248 Maryland, USA), with genomic DNA subsequently extracted using the QIAamp Fast DNA  
Tissue Kit protocol (QIAGEN<sup>®</sup> Corporation, Maryland, USA). To ascertain presence of high-  
250 quality genomic DNA (i.e., molecular weight >20kb), a 5 $\mu$ l aliquot of the DNA extract was  
separated on a 2% agarose gel and visualized using GelGreen on a blue-light transilluminator  
252 (Gel Doc<sup>™</sup> EZ Imager; Bio-Rad). DNA was then used as template material to amplify a coding  
section of the *PRNP* gene, following a protocol modified from previous studies<sup>31,32</sup>. For the

254 functional *PRNP* gene, the forward primer (CWD-13) straddles Intron 2 and Exon 3, with the  
reverse primer (CWD-LA) located 850bp downstream<sup>32</sup>. To ascertain if the polymorphisms were  
256 indeed in the functional *PRNP* gene, we tested for the presence of the non-coding *PRNP*  
pseudogene (*PRNP<sup>PSG</sup>*) by using pseudogene primers 223 and 224<sup>33</sup>.

258 Amplifications for the functional *PRNP* gene and the *PRNP<sup>PSG</sup>* pseudogene were  
performed in 20µl reactions consisting of 10µl Qiagen HotStart Master Mix (1unit HotStartTaq  
260 DNA Polymerase, PCR Buffer with 3mM MgCl<sub>2</sub>, and 400µM of each dNTP), 8µM each of the  
forward and reverse primer, 7.4µl DNase-free water, and 1µl of template DNA (~50-100ng).  
262 Thermocycling protocols consisted of an initial denaturation step of 15min at 95°C, followed by  
10 cycles of 45s denaturation at 95°C, 45s annealing at 57°C, and 75s extension at 72°C, 25  
264 cycles of 30s denaturation at 95°C, 30s annealing at 55°C and 60s extension at 72°C, completed  
with a final extension step of 5min at 72°C.

266 If both *PRNP* and *PRNP<sup>PSG</sup>* amplified in a sample, then each was sequenced to identify  
the true polymorphism in the functional *PRNP* gene. Amplicons were enzymatically purified,  
268 sequenced using BigDye v. 3.1 (Applied Biosystem Inc., Forest City, CA) dye-terminator  
chemistry, and resolved on an ABI 3730XL GeneAnalyzer (University of Illinois Keck Center  
270 for Functional and Comparative Genomics). Sequences were manually edited using Sequencher  
(v 5.4, Gene Codes, Ann Arbor MI) and aligned against a reference database of *PRNP* gene  
272 sequences obtained from the NCBI GenBank (Accession # AF156185.1; AY3600089.1;  
AY3600091.1).

274

### ***Haplotype phasing and network construction***

276 Following alignment, sequences were phased to haplotypes (paired nuclear alleles) using the

program PHASE2<sup>56</sup>, which reconstructs haplotypes using a probabilistic model of linkage  
278 disequilibrium. Only haplotypes assigned with >90% posterior probability (N=1,433) were  
retained. Scripts employed to format inputs and parse haplotype phasing are available at  
280 [github.com/tkchafin/haploTools](https://github.com/tkchafin/haploTools). Haplotypes were then categorized using a published  
nomenclature<sup>31</sup>, with haplotype frequencies calculated globally, by county, and by CWD status.  
282 We constructed a haplotype network to visualize similarity amongst haplotype, using the  
median-joining algorithm employed by POPART<sup>57</sup>. Scripts to formulate these input files are found  
284 at: [github.com/tkchafin/scripts](https://github.com/tkchafin/scripts).

### 286 ***Analysis of PRNP variants***

We first applied spatial interpolation to examine the structure of *PRNP* haplotypes as distributed  
288 across the state. Haplotype frequencies were computed by first dividing the state into non-  
overlapping ‘pseudo-populations’ that contained between 5-10 sampling localities each. This  
290 was done because our state-wide sampling process lacked *a priori* information with regard to  
natural population structure. Our results yielded N=211 polygons (Supplemental Figure 1). We  
292 then applied Empirical Bayesian Kriging in ARCMAP v10.7.1 (Esri, Inc.) to interpolate our  
posterior probabilities.

294 To associate disease with *PRNP* variants, we followed prior studies<sup>30,31</sup> by computing  
odds-ratios (OR). We first consider the probability of displaying an outcome (=CWD status)  
296 given the presence of a focal haplotype. An  $OR > 1$  = an over-representation of the focal  
haplotype among CWD-positive deer; an  $OR < 1$  indicates the focal haplotype is under-  
298 represented. We identified and evaluated haplotypes separately, by examining haplotype  
frequencies among age classes. We did so because a bias in relative representation can be driven

300 by multiple factors such as population structure, which may drive a coincident relationship. Here,  
we assumed that if a haplotype indeed affects the probability of survival to adulthood in CWD-  
302 present regions, presumably by reducing disease risk and/or progression, then it should show a  
significant change in relative representation in older age groups.

304 We then computed a selection coefficient ( $s$ ) as a relative fitness value. We first derived  
counts for each haplotype within each age class, then sampled across age classes as a time-series  
306 sample. We then estimated selection by examining changes in allele frequencies across this  
series, relative to that expected via stochastic change<sup>58</sup>. Finally, we modelled the effects non-  
308 synonymous mutations on protein conformation so as to test if they do indeed alter  $PrP^{SC}$  tertiary  
structure (as opposed to simply being linked to un-sequenced variation). To understand amino  
310 acid sequence conservation and possible deleterious effects at each non-synonymous position,  
we utilized two alignment-based algorithms, PROVEAN<sup>59</sup> and SIFT<sup>60</sup>. We also predicted protein  
312 stability using the support vector machine (SM)-based I-MUTANT2.0 tool<sup>61</sup>.

### 314 **Acknowledgments**

The authors thank hunters and wildlife managers statewide who collected WTD tissue samples.  
316 We give particular thanks to A.J. Riggs for helping to coordinate sample collection. We also  
thank former students and technicians P. McDill and L. Graham for contributions to study  
318 design, sample handling and organization, and DNA extraction.

### 320 **Disclosure statement**

No potential conflict of interest is reported by the authors.

322

## Funding

324 This project and the preparation of this publication was funded in part by the Pittman-  
Robertson Wildlife Restoration Grant Program (Grant #AR-W-F18AF00020) of the U.S.  
326 Fish and Wildlife Service through an agreement with the Arkansas Game and Fish  
Commission. The views and opinions expressed herein are those of the authors and do not  
328 necessarily reflect the views or policies of the Arkansas Game and Fish Commission. Product  
references do not constitute endorsements.

330

## ORCID

332 Tyler K. Chafin; <https://orcid.org/0000-0001-8687-5905>  
Michael E. Douglas; <https://orcid.org/0000-0001-9670-7825>

334

## References

- 338 1. Williams ES, Young S. Spongiform encephalopathies in Cervidae. *Rev Sci Tech* 1992; 11:551–67.
- 340 2. Mawdsley JR. Phylogenetic patterns suggest broad susceptibility to chronic wasting disease across Cervidae. *Wildl Soc Bull* 2020; 44:152–5.
- 342 3. Bishop RC. The economic impacts of chronic wasting disease (CWD) in Wisconsin. *Hum Dimens Wildl* 2004; 9:181–92.
- 344 4. Arnot C, Laate E, Unterschultz J, Adamowicz W. Chronic wasting disease (CWD) potential economic impact on cervid farming in Alberta. *J Toxicol Environ Heal - Part A Curr Issues* 2009; 72:1014–7.
- 346 5. Wasserberg G, Osnas EE, Rolley RE, Samuel MD. Host culling as an adaptive management tool for chronic wasting disease in white-tailed deer: A modelling study. *J Appl Ecol* 2009; 46:457–66.
- 348 6. Rivera NA, Brandt AL, Novakofski JE, Mateus-Pinilla NE. Chronic wasting disease in



- 350 cervids: Prevalence, impact and management strategies. *Vet Med Res Reports* 2019;  
10:123–39.
- 352 7. Uehlinger FD, Johnston AC, Bollinger TK, Waldner CL. Systematic review of  
management strategies to control chronic wasting disease in wild deer populations in  
354 North America. *BMC Vet Res* 2016; 12.
8. Miller MW, Fischer JR. The first five (or more) decades of chronic wasting disease:  
356 Lessons for the five decades to come. *Trans North Am Wildl Nat Resour Conf* 2016;  
81:1–12.
- 358 9. Aguzzi A, Sigurdson C, Heikenwaelder M. Molecular mechanisms of prion pathogenesis.  
*Annu Rev Pathol Mech Dis* 2008; 3:11–40.
- 360 10. Miller MW, Wild MA, Williams ES. Epidemiology of chronic wasting disease in captive  
Rocky Mountain elk. *J Wildl Dis* 1998; 34:532–8.
- 362 11. Selariu A, Powers JG, Nalls A, Brandhuber M, Mayfield A, Fullaway S, Wyckoff CA,  
Goldmann W, Zabel MM, Wild MA, et al. In utero transmission and tissue distribution of  
364 chronic wasting disease-associated prions in free-ranging Rocky Mountain elk. *J Gen  
Virol* 2015; 96:3444–55.
- 366 12. Nalls A V., McNulty E, Powers J, Seelig DM, Hoover C, Haley NJ, Hayes-Klug J,  
Anderson K, Stewart P, Goldmann W, et al. Mother to offspring transmission of chronic  
368 wasting disease in Reeves’ Muntjac deer. *PLoS One* 2013; 8:e71844.
13. Mathiason CK, Powers JG, Dahmes SJ, Osborn DA, Miller K V., Warren RJ, Mason GL,  
370 Hays SA, Hayes-Klug J, Seelig DM, et al. Infectious prions in the saliva and blood of deer  
with chronic wasting disease. *Science* 2006; 314:133–6.
- 372 14. Potapov A, Merrill E, Pybus M, Coltman D, Lewis MA. Chronic wasting disease: Possible  
transmission mechanisms in deer. *Ecol Modell* 2013; 250:244–57.
- 374 15. Gough KC, Maddison BC. Prion transmission: Prion excretion and occurrence in the  
environment. *Prion* 2010; 4:275–82.
- 376 16. Johnson CJ, Phillips KE, Schramm PT, McKenzie D, Aiken JM, Pedersen JA. Prions  
adhere to soil minerals and remain infectious. *PLoS Pathog* 2006; 2:e32.
- 378 17. Wiggins RC. Prion stability and infectivity in the environment. *Neurochem Res* 2009;  
34:158–68.
- 380 18. Potapov A, Merrill E, Pybus M, Lewis MA. Chronic wasting disease: Transmission  
mechanisms and the possibility of harvest management. *PLoS One* 2016; 11:1–20.
- 382 19. Manjerovic MB, Green ML, Mateus-Pinilla N, Novakofski J. The importance of localized  
culling in stabilizing chronic wasting disease prevalence in white-tailed deer populations.  
384 *Prev Vet Med [Internet]* 2014; 113:139–45. Available from:

<http://dx.doi.org/10.1016/j.prevetmed.2013.09.011>

- 386 20. McCoy JE, Hewitt DG, Bryant FC. Dispersal by yearling male white-tailed deer and  
implications for management. *J Wildl Manage* 2005; 69:366–76.
- 388 21. Long ES, Diefenbach DR, Rosenberry CS, Wallingford BD. Multiple proximate and  
ultimate causes of natal dispersal in white-tailed deer. *Behav Ecol* 2008; 19:1235–42.
- 390 22. Kelly AC, Mateus-Pinilla NE, Douglas M, Douglas M, Brown W, Ruiz MO, Killefer J,  
Shelton P, Beissel T, Novakofski J. Utilizing disease surveillance to examine gene flow  
392 and dispersal in white-tailed deer. *J Appl Ecol* 2010; 47:1189–98.
- 394 23. Mathiason CK, Hays SA, Powers J, Hayes-Klug J, Langenberg J, Dahmes SJ, Osborn DA,  
Miller K V., Warren RJ, Mason GL, et al. Infectious prions in pre-clinical deer and  
transmission of chronic wasting disease solely by environmental exposure. *PLoS One*  
396 2009; 4.
- 398 24. Tamguney G, Miller MW, Wolfe LL, Sirochman TM, Glidden D V., Palmer C, Lemus A,  
DeArmond SJ, Prusiner SB. Asymptomatic deer extrete infectious prions in feces. *Nature*  
2009; 461:529–32.
- 400 25. Saunders SE, Bartz JC, Bartelt-Hunt SL. Soil-mediated prion transmission: Is local soil-  
type a key determinant of prion disease incidence? *Chemosphere* 2012; 87:661–7.
- 402 26. Hemming-Schroeder E, Lo E, Salazar C, Puente S, Yan G. Landscape genetics: A toolbox  
for studying vector-borne diseases. *Front Ecol Evol* 2018; 6:1–11.
- 404 27. Kelly AC, Mateus-Pinilla NE, Brown W, Ruiz MO, Douglas MR, Douglas ME, Shelton P,  
Beissel T, Novakofski J. Genetic assessment of environmental features that influence deer  
406 dispersal: Implications for prion-infected populations. *Popul Ecol* 2014; 56:327–40.
- 408 28. Robinson SJ, Samuel MD, O'Rourke KI, Johnson CJ. The role of genetics in chronic  
wasting disease of North American cervids. *Prion* 2012; 6:153–62.
- 410 29. Kelly AC, Mateus-Pinilla NE, Diffendorfer J, Jewell E, Ruiz MO, Killefer J, Shelton P,  
Beissel T, Novakofski J. Prion sequence polymorphisms and chronic wasting disease  
resistance in Illinois white-tailed deer (*Odocoileus virginianus*). *Prion* 2008; 2:28–36.
- 412 30. Brandt AL, Green ML, Ishida Y, Roca AL, Novakofski J, Mateus-Pinilla NE. Influence of  
the geographic distribution of prion protein gene sequence variation on patterns of chronic  
414 wasting disease spread in white-tailed deer (*Odocoileus virginianus*). *Prion* 2018; 12:204–  
15.
- 416 31. Brandt AL, Kelly AC, Green ML, Shelton P, Novakofski J, Mateus-Pinilla NE. Prion  
protein gene sequence and chronic wasting disease susceptibility in white-tailed deer  
418 (*Odocoileus virginianus*). *Prion* 2015; 9:449–62.
32. Johnson C, Johnson J, Clayton M, McKenzie D, Aiken J. Prion protein gene heterogeneity

- 420 in free-ranging white-tailed deer within the chronic wasting disease affected region of  
Wisconsin. *J Wildl Dis* 2003; 39:576–81.
- 422 33. O'Rourke KI, Spraker TR, Hamburg LK, Besser TE, Brayton KA, Knowles DP.  
424 Polymorphisms in the prion precursor functional gene but not the pseudogene are  
associated with susceptibility to chronic wasting disease in white-tailed deer. *J Gen Virol*  
2004; 85:1339–46.
- 426 34. Johnson CJ, Herbst A, Duque-Velasquez C, Vanderloo JP, Bochsler P, Chappell R,  
428 McKenzie D. Prion protein polymorphisms affect chronic wasting disease progression.  
*PLoS One* 2011; 6.
- 430 35. Race B, Meade-White K, Miller MW, Fox KA, Chesebro B. *In vivo* comparison of  
chronic wasting disease infectivity from deer with variation at prion protein residue 96. *J*  
*Virol* 2011; 85:9235–8.
- 432 36. Miller WL, Walter WD. Spatial heterogeneity of prion gene polymorphisms in an area  
recently infected by chronic wasting disease. *Prion* 2019; 13:65–76.
- 434 37. Avise JC. Phylogeography: Retrospect and prospect. *J Biogeogr* 2009; 36:3–15.
- 436 38. Barton NH, Servedio MR. The interpretation of selection coefficients. *Evolution* 2015;  
69:1101–12.
39. Felsenstein J. Phylogenies and the comparative method. *Am Nat* 1985; 125:1–15.
- 438 40. Hoggart CJ, Parra EJ, Shriver MD, Bonilla C, Kittles RA, Clayton DG, McKeigue PM.  
440 Control of confounding of genetic associations in stratified populations. *Am J Hum Genet*  
2003; 72:1492–504.
- 442 41. Pagel M. Detecting correlated evolution on phylogenies: A general method for the  
comparative analysis of discrete characters. *Proc R Soc B Biol Sci* 1994; 255:37–45.
- 444 42. Carlson J, Kadie C, Mallal S, Heckerman D. Leveraging hierarchical population structure  
in discrete association studies. *PLoS One* 2007; 2.
- 446 43. Cook RL, Hart R V. Ages assigned known-age Texas white-tailed deer: Tooth wear  
versus cementum analysis. In: *Proceedings of the Annual Conference of the Southeastern*  
*Association of Fish and Wildlife Agencies*. 1979.
- 448 44. Mitchell CJ, Smith WP. Reliability of techniques for determining age in southern white-  
tailed deer. *J Tennessee Adacemy Sci* 1991; 66:117–20.
- 450 45. Gee KL, Holman JH, Causey MK, Rossi AN, Armstrong JB. Aging white-tailed deer by  
452 tooth replacement and wear: A critical evaluation of a time-honored technique. *Wildl Soc*  
*Bull* 2002; 30:387–93.
46. Seabury CM, Oldeschulte DL, Bhattarai EK, Legare D, Ferro PJ, Metz RP, Johnson CD,

- 454 Lockwood MA, Nichols TA. Accurate genomic predictions for chronic wasting disease in  
U.S. white-tailed deer. *G3* 2020; 10:1433–41.
- 456 47. Hagenaars TJ, Melchior MB, Bossers A, Davidse A, Engel B, van Zijderveld FG. Scrapie  
458 prevalence in sheep of susceptible genotype is declining in a population subject to  
breeding for resistance. *BMC Vet Res* 2010; 6:1–11.
- 460 48. Goldmann W. PrP genetics in ruminant transmissible spongiform encephalopathies. *Vet  
Res* 2008; 39.
- 462 49. Herbst A, Velásquez CD, Triscott E, Aiken JM, McKenzie D. Chronic wasting disease  
prion strain emergence and host range expansion. *Emerg. Infect. Dis.* 2017; 23:1598–600.
- 464 50. Johnson C, Johnson J, Vanderloo JP, Keane D, Aiken JM, McKenzie D. Prion protein  
polymorphisms in white-tailed deer influence susceptibility to chronic wasting disease. *J  
Gen Virol* 2006; 87:2109–14.
- 466 51. Stein RA. Super-spreaders in infectious diseases. *Int J Infect Dis* 2011; 15:e510–3.
- 468 52. Pöschel T, Brilliantov N V., Frömmel C. Kinetics of prion growth. *Biophys J* 2003;  
85:3460–74.
- 470 53. White LA, Forester JD, Craft ME. Disease outbreak thresholds emerge from interactions  
between movement behavior, landscape structure, and epidemiology. *Proc Natl Acad Sci  
U S A* 2018; 115:7374–9.
- 472 54. Blanchong JA, Robinson SJ, Samuel MD, Foster JT. Application of genetics and  
genomics to wildlife epidemiology. *J Wildl Manage* 2016; 80:593–608.
- 474 55. Severinghaus CW. Tooth development and wear as criteria of age in white-tailed deer. *J  
Wildl Manage* 1949; 13:195–216.
- 476 56. Stephens M, Smith NJ, Donnelly P. A new statistical method for haplotype reconstruction  
from population data. *Am J Hum Genet* 2001; 68:978–89.
- 478 57. Leigh JW, David B, Shinichi N. popart: full feature software for haplotype network  
construction. *Methods Ecol Evol* 2015; 6:1110–6.
- 480 58. Mathieson I, McVean G. Estimating selection coefficients in spatially structured  
populations from time series data of allele frequencies. *Genetics* 2013; 193:973–84.
- 482 59. Choi Y, Sims GE, Murphy S, Miller JR, Chan AP. Predicting the Functional Effect of  
Amino Acid Substitutions and Indels. *PLoS One* 2012; 7.
- 484 60. Sim NL, Kumar P, Hu J, Henikoff S, Schneider G, Ng PC. SIFT web server: Predicting  
effects of amino acid substitutions on proteins. *Nucleic Acids Res* 2012; 40:452–7.
- 486 61. Capriotti E, Fariselli P, Casadio R. I-Mutant2.0: Predicting stability changes upon

mutation from the protein sequence or structure. *Nucleic Acids Res* 2005; 33:306–10.

490 **Table 1:** *PRNP* haplotypes tabulated from 1,433 white-tailed deer tissues collected from 75  
 491 counties in Arkansas (2016-2019). Haplotypes (Hap) are identified by letter (A-V) following  
 492 Brandt et al. (2015, 2018). Haplotypes denoted as AR1-4 are previously unreported. Mutations  
 493 that differ from haplotype A are shaded, with green indicating synonymous substitutions (no  
 494 amino acid change) and blue as non-synonymous (amino acid changed in protein; NSS). Also  
 495 listed are amino acid position and nucleotide site (Brandt et al. 2015, 2018).

496

| Hap | NSS  | Amino Acid Position |     |     |     |     |     |     |     |     |     |     |      |     |     |
|-----|------|---------------------|-----|-----|-----|-----|-----|-----|-----|-----|-----|-----|------|-----|-----|
|     |      | 20                  | 51  | 81  | 95  | 96  | 99  | 108 | 122 | 124 | 126 | 146 | 166  | 185 | 225 |
|     |      | Nucleotide Site     |     |     |     |     |     |     |     |     |     |     |      |     |     |
|     |      | 60                  | 153 | 243 | 285 | 286 | 299 | 324 | 367 | 372 | 378 | 438 | 499* | 555 | 676 |
| A   |      | C                   | C   | T   | A   | G   | G   | A   | G   | G   | G   | C   | A    | C   | C   |
| B   |      | C                   | C   | T   | A   | G   | G   | A   | G   | G   | G   | C   | A    | T   | C   |
| C   | 96S  | C                   | C   | T   | A   | A   | G   | A   | G   | G   | G   | C   | A    | T   | C   |
| D   |      | C                   | T   | T   | A   | G   | G   | A   | G   | G   | G   | C   | A    | C   | C   |
| E   |      | C                   | C   | T   | A   | G   | G   | A   | G   | G   | G   | T   | A    | C   | C   |
| G   |      | T                   | C   | T   | A   | G   | G   | A   | G   | G   | G   | C   | A    | C   | C   |
| I   | 96S  | C                   | C   | A   | A   | A   | G   | A   | G   | G   | G   | C   | A    | T   | C   |
| J   |      | C                   | C   | T   | A   | G   | G   | G   | G   | G   | G   | C   | A    | C   | C   |
| K   | 225K | T                   | C   | T   | A   | G   | G   | A   | G   | G   | G   | C   | A    | C   | A   |
| L   | 122T | C                   | C   | T   | A   | G   | G   | A   | A   | G   | G   | C   | A    | C   | C   |
| O   |      | T                   | T   | T   | A   | G   | G   | A   | G   | G   | G   | C   | A    | C   | C   |
| P   | 96S  | C                   | C   | T   | A   | A   | G   | A   | G   | G   | G   | C   | A    | C   | C   |
| R   |      | C                   | T   | T   | A   | G   | G   | A   | G   | G   | G   | C   | A    | T   | C   |
| T   |      | C                   | T   | T   | A   | G   | G   | A   | G   | G   | A   | C   | A    | C   | C   |
| V   | 96S  | C                   | T   | T   | A   | A   | G   | A   | G   | G   | G   | C   | A    | C   | C   |
| AR1 |      | C                   | C   | T   | A   | G   | G   | G   | G   | G   | A   | C   | A    | C   | C   |
| AR2 | 96S  | C                   | C   | T   | A   | A   | G   | A   | G   | G   | G   | C   | C    | T   | C   |
| AR3 | 96S  | T                   | C   | T   | A   | A   | G   | A   | G   | G   | G   | C   | A    | T   | C   |
| AR4 |      | C                   | C   | T   | A   | G   | G   | A   | G   | G   | G   | T   | A    | T   | C   |

498 **Table 2:** *PRNP* haplotype frequencies and odds-ratios, as associated with CWD status of white-  
 500 tailed deer in Arkansas, 2016-2019. Haplotypes were derived from unphased sequences  
 502 representing 720 nucleotides of the *PRNP* gene. Haplotypes (Hap) are identified by letter (A-V)  
 504 following Brandt et al. (2015, 2018). Haplotypes denoted AR1-4 are previously unreported.  
 506 Listed are total numbers (N) and relative frequency (%) and associated values for deer that were  
 CWD-negative (-), CWD-positive (+) or untested (?). Odds Ratio (OR) reflects relative  
 representation of a haplotype in CWD-positive deer; OR>1 indicated over-representation, OR<1  
 under-representation. SE= standard error, CI= 95% confidence interval, Z= OR Z-score and p=  
 OR p-value. Values in bold are significant.

| Hap        | Counts |      |      |      | Frequency (%) |       |       |       | Odds Ratio  |             |                    | Z            | p           |
|------------|--------|------|------|------|---------------|-------|-------|-------|-------------|-------------|--------------------|--------------|-------------|
|            | N      | N(-) | N(+) | N(?) | %             | %(-)  | %(+)  | %(?)  | OR          | SE          | CI                 |              |             |
| <b>A</b>   | 435    | 367  | 34   | 34   | 15.18         | 15.17 | 13.71 | 17.17 | 0.89        | 0.19        | [0.61-1.30]        | -0.61        | 0.54        |
| <b>B</b>   | 657    | 536  | 90   | 31   | 22.92         | 22.15 | 36.29 | 15.66 | <b>2.00</b> | <b>0.14</b> | <b>[1.52-2.64]</b> | <b>4.93</b>  | <b>0.00</b> |
| <b>C</b>   | 426    | 376  | 13   | 37   | 14.86         | 15.54 | 5.24  | 18.69 | <b>0.30</b> | <b>0.29</b> | <b>[0.17-0.53]</b> | <b>-4.14</b> | <b>0.00</b> |
| <b>D</b>   | 657    | 547  | 63   | 47   | 22.92         | 22.60 | 25.40 | 23.74 | 1.17        | 0.15        | [0.86-1.58]        | 1.00         | 0.32        |
| <b>E</b>   | 187    | 160  | 16   | 11   | 6.52          | 6.61  | 6.45  | 5.56  | 0.97        | 0.27        | [0.57-1.66]        | -0.10        | 0.92        |
| <b>G</b>   | 309    | 266  | 24   | 19   | 10.78         | 10.99 | 9.68  | 9.60  | 0.87        | 0.22        | [0.56-1.35]        | -0.63        | 0.53        |
| <b>I</b>   | 42     | 39   | 1    | 2    | 1.47          | 1.61  | 0.40  | 1.01  | 0.25        | 1.01        | [0.03-1.81]        | -1.38        | 0.17        |
| <b>J</b>   | 65     | 59   | 3    | 3    | 2.27          | 2.44  | 1.21  | 1.52  | 0.49        | 0.60        | [0.15-1.57]        | -1.20        | 0.23        |
| <b>K</b>   | 10     | 9    | 1    | 0    | 0.35          | 0.37  | 0.40  | 0.00  | 1.08        | 1.06        | [0.14-8.60]        | 0.08         | 0.94        |
| <b>L</b>   | 2      | 2    | 0    | 0    | 0.07          | 0.08  | 0.00  | 0.00  | -           | -           | -                  | -            | -           |
| <b>O</b>   | 3      | 2    | 1    | 0    | 0.10          | 0.08  | 0.40  | 0.00  | 4.89        | 1.23        | [0.44-54.2]        | 1.29         | 0.20        |
| <b>P</b>   | 10     | 8    | 0    | 2    | 0.35          | 0.33  | 0.00  | 1.01  | -           | -           | -                  | -            | -           |
| <b>R</b>   | 2      | 2    | 0    | 0    | 0.07          | 0.08  | 0.00  | 0.00  | -           | -           | -                  | -            | -           |
| <b>T</b>   | 41     | 30   | 1    | 10   | 1.43          | 1.24  | 0.40  | 5.05  | 0.32        | 1.02        | [0.04-2.38]        | -1.11        | 0.27        |
| <b>V</b>   | 1      | 1    | 0    | 0    | 0.03          | 0.04  | 0.00  | 0.00  | -           | -           | -                  | -            | -           |
| <b>AR1</b> | 1      | 0    | 0    | 1    | 0.03          | 0.00  | 0.00  | 0.51  | -           | -           | -                  | -            | -           |
| <b>AR2</b> | 15     | 14   | 0    | 1    | 0.52          | 0.58  | 0.00  | 0.51  | -           | -           | -                  | -            | -           |
| <b>AR3</b> | 2      | 2    | 0    | 0    | 0.07          | 0.08  | 0.00  | 0.00  | -           | -           | -                  | -            | -           |
| <b>AR4</b> | 1      | 0    | 1    | 0    | 0.03          | 0.00  | 0.40  | 0.00  | -           | -           | -                  | -            | -           |

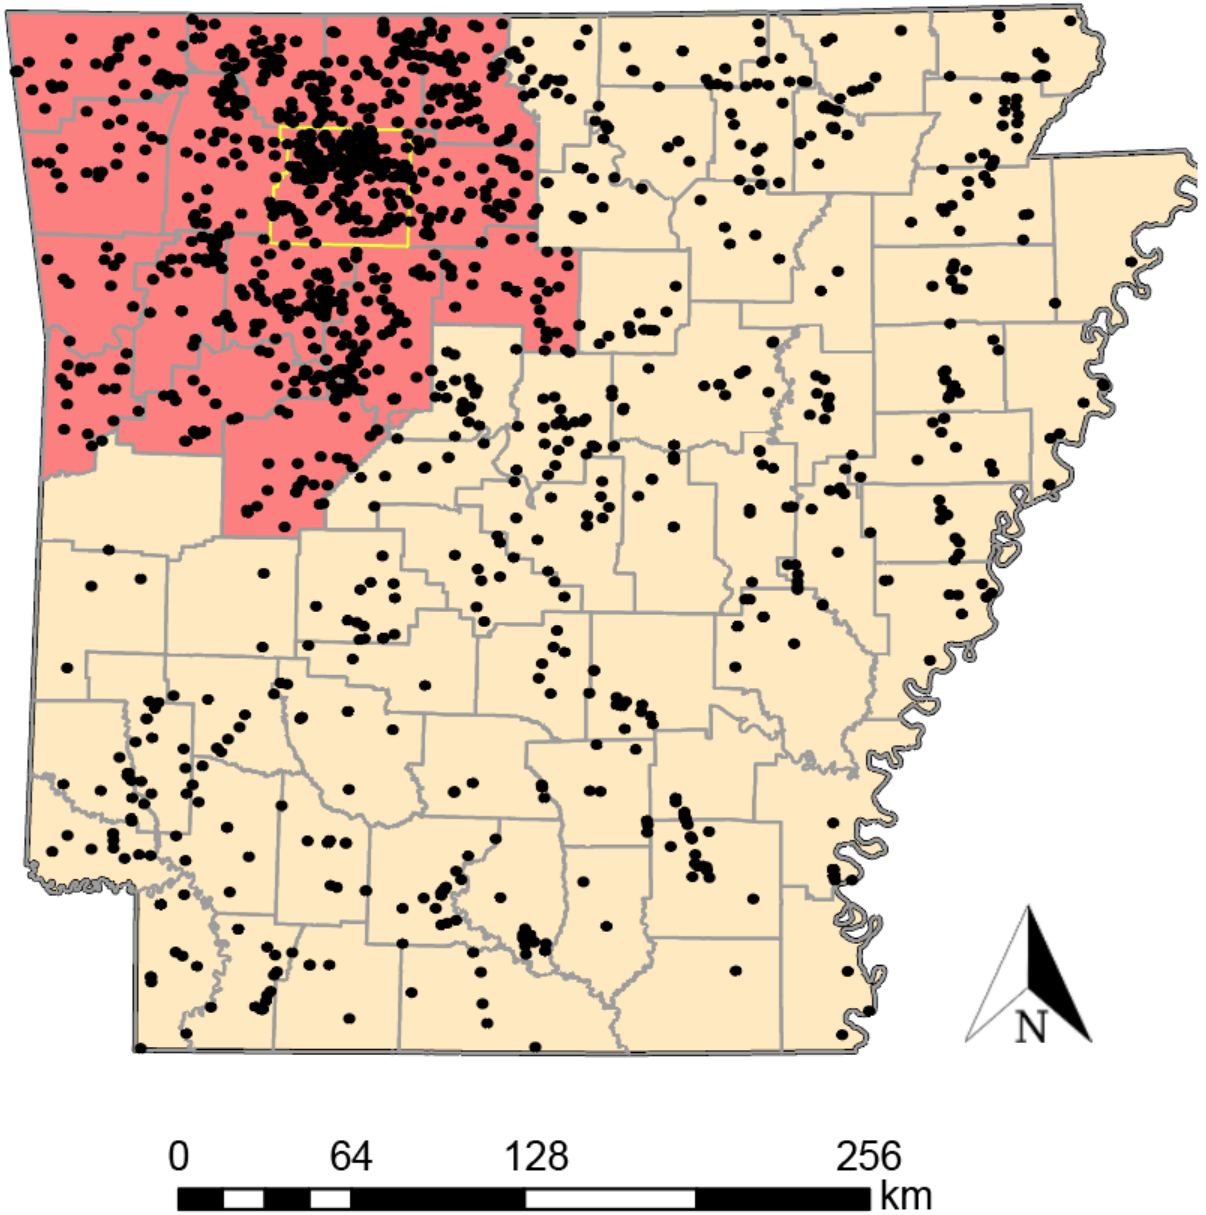



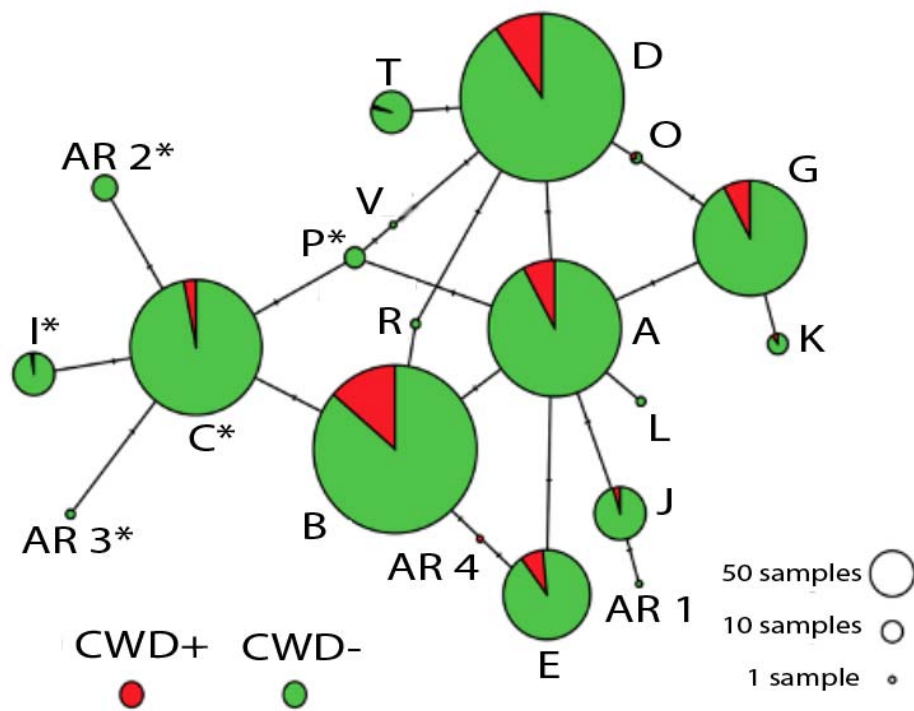

514

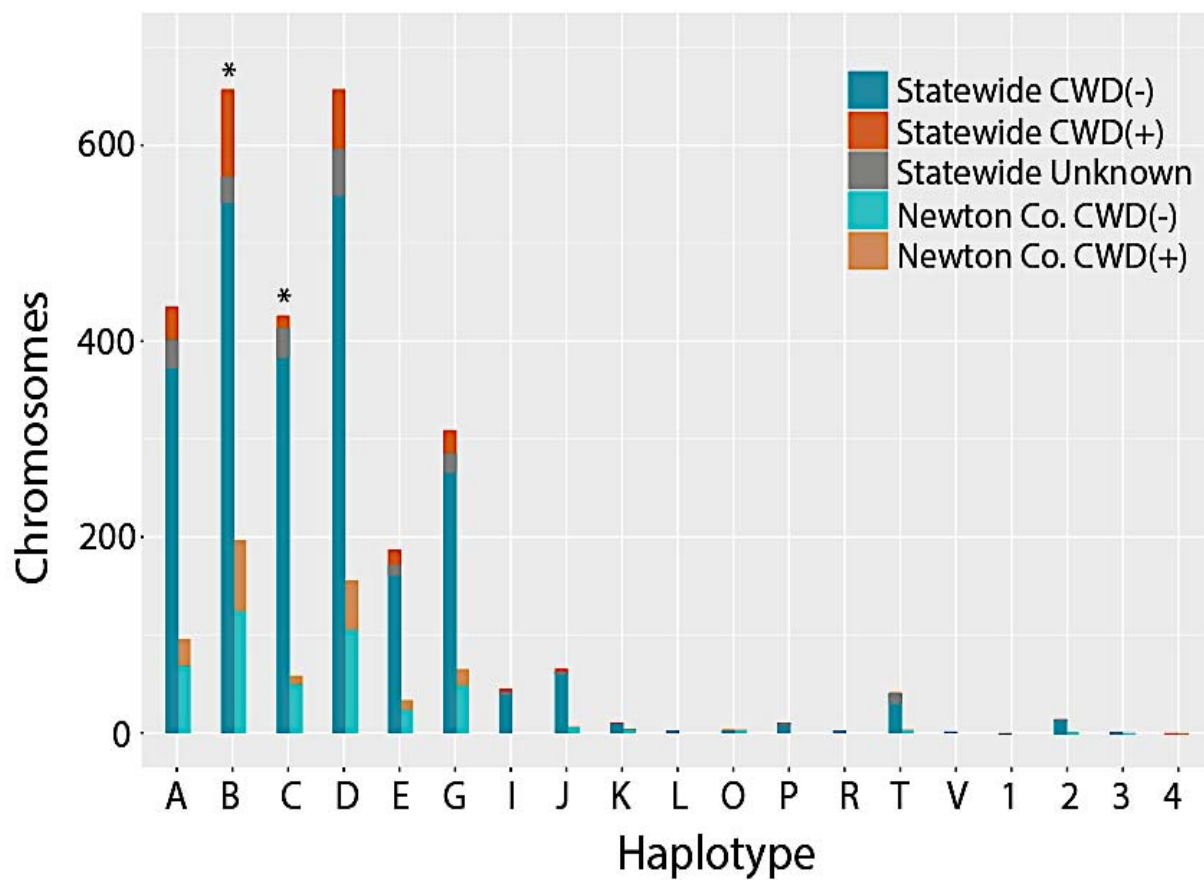

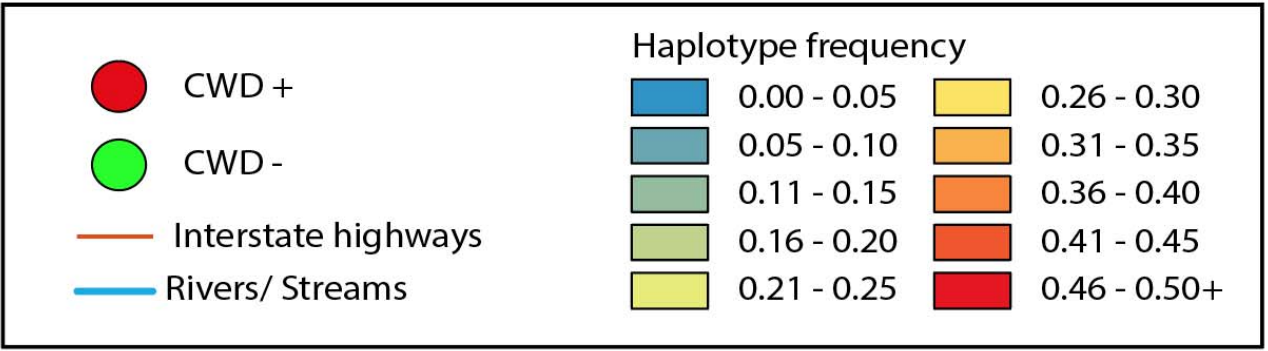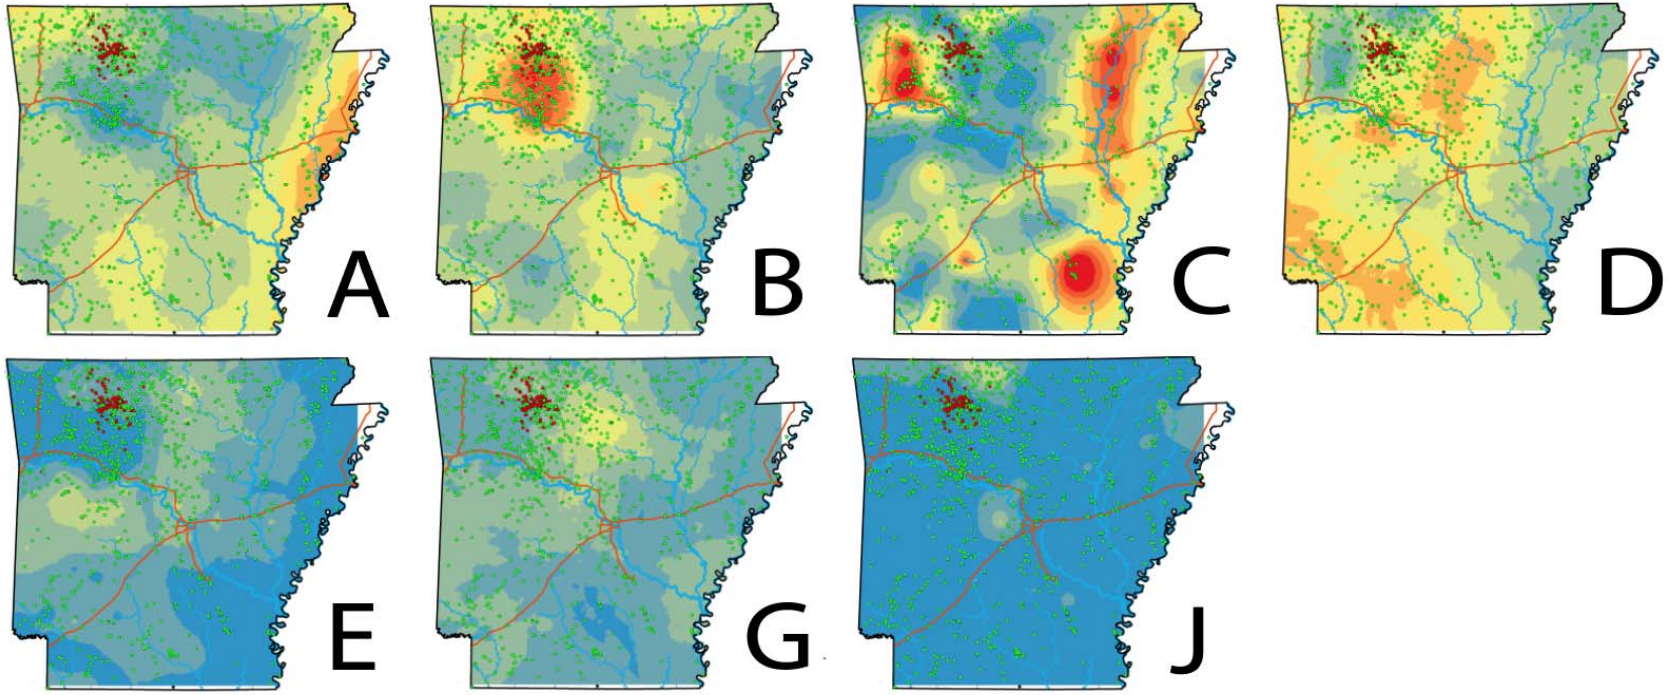

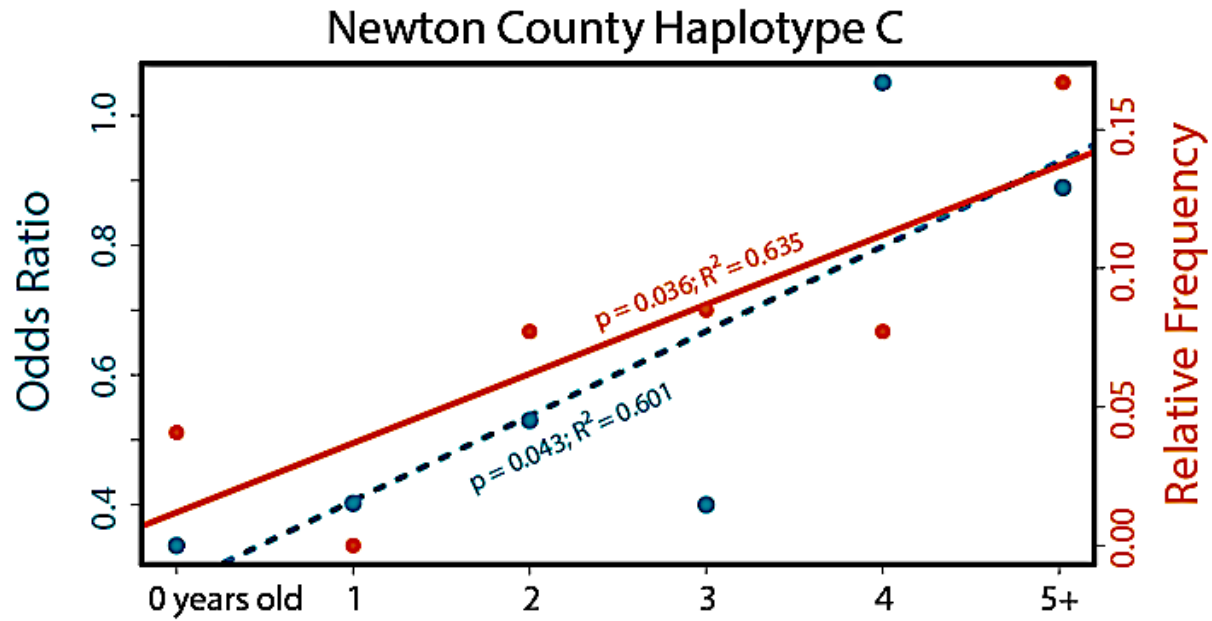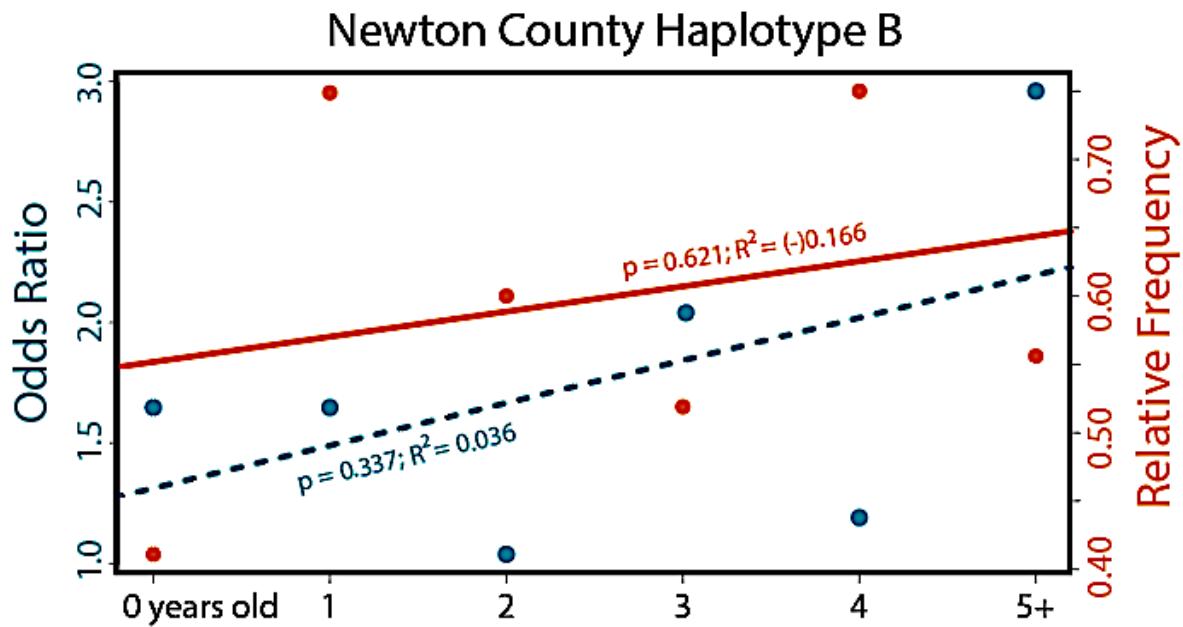

518

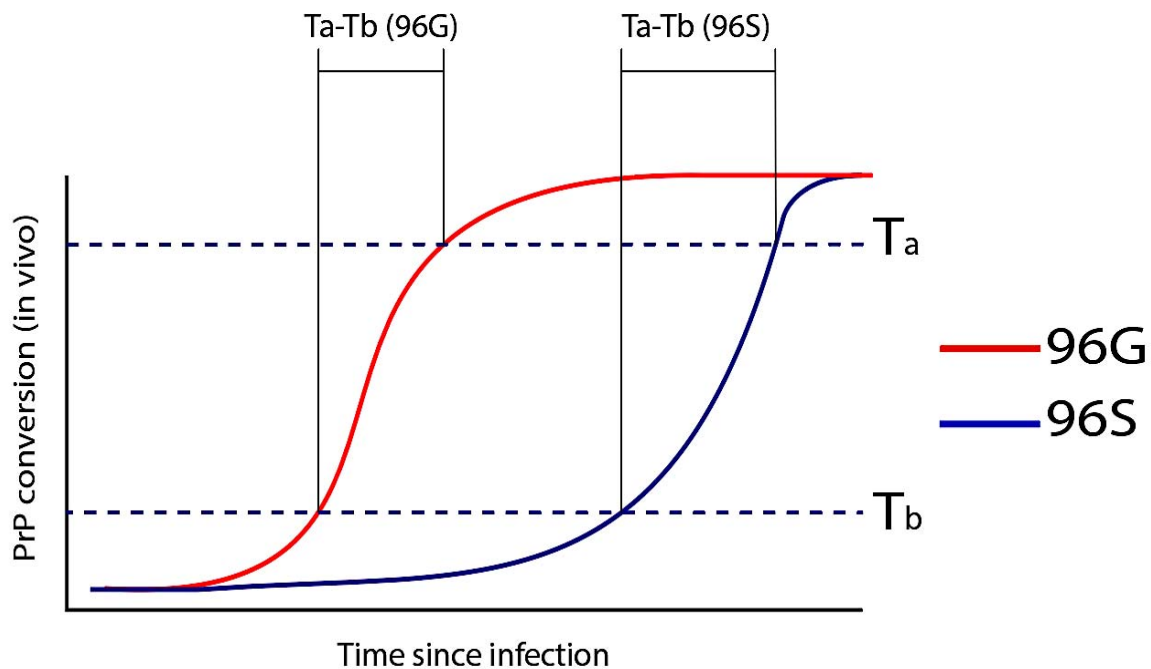

520 **Figure 1:** Sampling locations for white-tailed deer tissues from Arkansas evaluated in this study.

The red shaded area indicates the 16 counties included in the 2019 Chronic Wasting Disease  
522 Management Zone (CWDMZ), with a yellow boundary surrounding a focal area encompassing  
Newton County. Black dots represent collection localities for each individual tissue. Note that  
524 the boundaries of the CWDMZ have since expanded.

526 **Figure 2:** Haplotype network showing relationship of prion gene variants (*PRNP*) detected  
across 1,433 white-tailed deer collected from 75 counties in Arkansas (2016-2019). Data are  
528 based on sequence analysis of 720 nucleotides. Circles represent 20 haplotypes (=alleles) with  
size reflecting frequency of occurrence in entire data set (Table 3), and tick marks representing  
530 number of mutations (=nucleotide substitutions) distinguishing one from another (Table 2).  
Color codes reflect relative frequency among CWD-positive (red) and CWD-negative/  
532 undetected (green). Letters correspond to haplotype names (per Brandt et al. 2015), with  
haplotypes unique to Arkansas indicated with numbers (AR#). Haplotypes sharing the 96S  
534 mutation are indicated with (\*).

536 **Figure 3:** Frequency distribution of 2,866 *PRNP* haplotypes detected in white-tailed deer  
collected in Arkansas, 2016-2019. Haplotypes were determined by phasing individual genotypes  
538 derived from sequencing 1,433 deer across 720 bp of the *PRNP* gene. Letters (A through V) refer  
to haplotypes identified in Brandt et al. (2015), whereas numbers (1-4) are haplotypes unique to  
540 Arkansas, and thus previously unreported. Frequencies are plotted for all 1,433 samples  
(=statewide) and a subset of 314 samples from Newton County (N=628 chromosomes). Color

542 codes reflect frequency among CWD-positive (CWD+) and CWD-negative (CWD-) samples;  
unknown indicates samples that were not tested for CWD.

544

**Figure 4:** Topographies that represent interpolated haplotype frequencies for the *PRNP* gene in  
546 Arkansas. Frequency is depicted by color, with blue reflecting low occurrence (0-5%) whereas  
red indicating 46-50+% of haplotypes were of this type.

548

**Figure 5:** Relative frequency and odds ratio for two haplotypes of the prion gene *PRNP*  
550 haplotypes detected in white-tailed deer age cohorts (<1 year to 5+ years) sampled in Arkansas  
from 2016-2019. Prion gene variant Haplotype C (top panel) has been associated with reduced  
552 susceptibility to CWD, whereas Haplotype B (lower panel) has been associated with higher  
susceptibility (Brandt et al. 2018). Data are based on phased haplotypes derived from 720  
554 nucleotides of the *PRNP* gene sequenced across 1,433 deer.

556 **Figure 6:** Results of a conceptual model depicting prion conversion rates for *PrP<sup>C</sup>* variants 96G  
and 96S. The diagram demonstrates prion conversion of 96G and 96S (reduced susceptibility)  
558 prion gene (=PRNP) variants. Theoretical prion protein (=PrP) mass thresholds were imposed:  
Ta = time of symptomatic expression; and Tb = theoretical time after which individuals remain  
560 asymptomatic. Individual-individual transmission is possible through direct contact (saliva) or  
shedding (e.g. feces). The time interval for *asymptomatic spread* (e.g., prion shedding from a  
562 subclinical individual) extends prior to *PrP* conversion surpassing threshold Tb, but not  
extending beyond Ta.

564







|                     |             |            |            |            |            |            |            |           |           |           |          |          |           |          |           |          |          |           |          |          |
|---------------------|-------------|------------|------------|------------|------------|------------|------------|-----------|-----------|-----------|----------|----------|-----------|----------|-----------|----------|----------|-----------|----------|----------|
| <b>Johnson</b>      | <b>45</b>   | 10         | 33         | 19         | 20         | 1          | 4          | 1         | -         | -         | -        | -        | 1         | -        | -         | -        | -        | 1         | -        | -        |
| <b>Lafayette</b>    | <b>15</b>   | 5          | 3          | 7          | 5          | 1          | 4          | 1         | -         | -         | -        | -        | -         | -        | 3         | -        | -        | 1         | -        | -        |
| <b>Lincoln</b>      | <b>9</b>    | 3          | 3          | 5          | 4          | -          | 1          | -         | 2         | -         | -        | -        | -         | -        | -         | -        | -        | -         | -        | -        |
| <b>Lee</b>          | <b>8</b>    | 4          | 6          | 3          | 1          | -          | 1          | -         | -         | 1         | -        | -        | -         | -        | -         | -        | -        | -         | -        | -        |
| <b>Lonoke</b>       | <b>13</b>   | 6          | 4          | 5          | 7          | 3          | 1          | -         | -         | -         | -        | -        | -         | -        | -         | -        | -        | -         | -        | -        |
| <b>Logan</b>        | <b>41</b>   | 12         | 15         | 3          | 26         | 12         | 13         | -         | 1         | -         | -        | -        | -         | -        | -         | -        | -        | -         | -        | -        |
| <b>Little River</b> | <b>10</b>   | 1          | 4          | 5          | 8          | 1          | 1          | -         | -         | -         | -        | -        | -         | -        | -         | -        | -        | -         | -        | -        |
| <b>Lawrence</b>     | <b>16</b>   | 1          | 3          | 16         | 2          | 4          | 3          | -         | -         | -         | -        | -        | -         | -        | 3         | -        | -        | -         | -        | -        |
| <b>Madison</b>      | <b>36</b>   | 9          | 18         | 24         | 6          | 3          | 6          | 1         | 2         | -         | -        | -        | -         | -        | 2         | -        | -        | 1         | -        | -        |
| <i>Madison(+)</i>   | <i>4</i>    | 1          | 1          | 1          | -          | 2          | -          | 1         | 2         | -         | -        | -        | -         | -        | -         | -        | -        | -         | -        | -        |
| <b>Marion</b>       | <b>40</b>   | 10         | 12         | 11         | 12         | 10         | 7          | -         | 1         | -         | -        | 2        | -         | 1        | -         | -        | -        | -         | -        | -        |
| <b>Miller</b>       | <b>8</b>    | 3          | 5          | 2          | 1          | 1          | 2          | -         | -         | -         | -        | -        | -         | -        | 2         | -        | -        | -         | -        | -        |
| <b>Monroe</b>       | <b>9</b>    | 4          | 1          | 5          | 3          | 4          | 1          | -         | -         | -         | -        | -        | -         | -        | -         | -        | -        | -         | -        | -        |
| <b>Montgomery</b>   | <b>2</b>    | 1          | 1          | 2          | -          | -          | -          | -         | -         | -         | -        | -        | -         | -        | -         | -        | -        | -         | -        | -        |
| <b>Mississippi</b>  | <b>2</b>    | 2          | -          | 1          | -          | -          | -          | -         | 1         | -         | -        | -        | -         | -        | -         | -        | -        | -         | -        | -        |
| <b>Nevada</b>       | <b>14</b>   | 7          | -          | 6          | 10         | 2          | 3          | -         | -         | -         | -        | -        | -         | -        | -         | -        | -        | -         | -        | -        |
| <b>Newton</b>       | <b>216</b>  | 68         | 124        | 49         | 105        | 23         | 48         | -         | 5         | 3         | -        | 2        | -         | -        | 2         | -        | -        | 2         | 1        | -        |
| <i>Newton(+)</i>    | <i>100</i>  | 28         | 75         | 10         | 54         | 11         | 17         | -         | 1         | 1         | -        | 1        | -         | -        | 1         | -        | -        | -         | -        | 1        |
| <b>Ouachita</b>     | <b>14</b>   | 4          | 3          | 3          | 13         | 3          | 1          | 1         | -         | -         | -        | -        | -         | -        | -         | -        | -        | -         | -        | -        |
| <b>Perry</b>        | <b>8</b>    | 4          | 3          | 2          | 2          | -          | 2          | 2         | 1         | -         | -        | -        | -         | -        | -         | -        | -        | -         | -        | -        |
| <b>Phillips</b>     | <b>9</b>    | 8          | 1          | 1          | 1          | -          | 5          | -         | 1         | -         | -        | -        | -         | -        | -         | -        | -        | -         | 1        | -        |
| <b>Pike</b>         | <b>8</b>    | 2          | 3          | 2          | 5          | -          | 2          | 2         | -         | -         | -        | -        | -         | -        | -         | -        | -        | -         | -        | -        |
| <b>Polk</b>         | <b>3</b>    | 2          | -          | -          | -          | 2          | 1          | 1         | -         | -         | -        | -        | -         | -        | -         | -        | -        | -         | -        | -        |
| <b>Poinsett</b>     | <b>13</b>   | 7          | 1          | 5          | 6          | 2          | 3          | -         | 1         | -         | -        | -        | -         | -        | -         | -        | -        | 1         | -        | -        |
| <b>Pope</b>         | <b>61</b>   | 3          | 48         | 9          | 41         | 3          | 15         | 3         | -         | -         | -        | -        | -         | -        | -         | -        | -        | -         | -        | -        |
| <i>Pope(+)</i>      | <i>1</i>    | -          | 1          | -          | -          | -          | 1          | -         | -         | -         | -        | -        | -         | -        | -         | -        | -        | -         | -        | -        |
| <b>Prairie</b>      | <b>11</b>   | 3          | 5          | 7          | 3          | -          | 1          | 1         | -         | 2         | -        | -        | -         | -        | -         | -        | -        | -         | -        | -        |
| <b>Pulaski</b>      | <b>11</b>   | 3          | 3          | 4          | 5          | 3          | 3          | 1         | -         | -         | -        | -        | -         | -        | -         | -        | -        | -         | -        | -        |
| <b>Randolph</b>     | <b>8</b>    | 3          | 3          | 5          | 3          | -          | -          | -         | 1         | -         | -        | -        | -         | -        | 1         | -        | -        | -         | -        | -        |
| <b>Saline</b>       | <b>12</b>   | 4          | 4          | 4          | 1          | 3          | 3          | 1         | 2         | -         | -        | -        | -         | -        | 2         | -        | -        | -         | -        | -        |
| <b>Sebastian</b>    | <b>16</b>   | 6          | 3          | 2          | 12         | 3          | 5          | 1         | -         | -         | -        | -        | -         | -        | -         | -        | -        | -         | -        | -        |
| <i>Sebastian(+)</i> | <i>1</i>    | -          | 1          | -          | 1          | -          | -          | -         | -         | -         | -        | -        | -         | -        | -         | -        | -        | -         | -        | -        |
| <b>Scott</b>        | <b>2</b>    | 1          | 2          | -          | 1          | -          | -          | -         | -         | -         | -        | -        | -         | -        | -         | -        | -        | -         | -        | -        |
| <b>Searcy</b>       | <b>42</b>   | 8          | 15         | 7          | 31         | 5          | 16         | -         | 1         | -         | -        | -        | 1         | -        | -         | -        | -        | -         | -        | -        |
| <b>St Francis</b>   | <b>8</b>    | 4          | 4          | 3          | 5          | -          | -          | -         | -         | -         | -        | -        | -         | -        | -         | -        | -        | -         | -        | -        |
| <b>Sharp</b>        | <b>15</b>   | 3          | 6          | 7          | 8          | 1          | 1          | -         | 1         | -         | -        | -        | -         | -        | 3         | -        | -        | -         | -        | -        |
| <b>Stone</b>        | <b>15</b>   | 6          | 5          | 3          | 6          | 1          | 9          | -         | -         | -         | -        | -        | -         | -        | -         | -        | -        | -         | -        | -        |
| <b>Sevier</b>       | <b>10</b>   | 5          | 1          | 2          | 5          | 1          | 4          | 2         | -         | -         | -        | -        | -         | -        | -         | -        | -        | -         | -        | -        |
| <b>Union</b>        | <b>7</b>    | 3          | 3          | 1          | 4          | 1          | 1          | -         | -         | -         | -        | -        | -         | -        | -         | -        | -        | 1         | -        | -        |
| <b>VanBuren</b>     | <b>33</b>   | 7          | 10         | 2          | 21         | 8          | 14         | 2         | -         | -         | 1        | -        | -         | -        | -         | 1        | -        | -         | -        | -        |
| <b>Washington</b>   | <b>18</b>   | 7          | 5          | 11         | 9          | -          | 2          | 1         | 1         | -         | -        | -        | -         | -        | -         | -        | -        | -         | -        | -        |
| <b>Woodruff</b>     | <b>9</b>    | 1          | 2          | 7          | 2          | 1          | 4          | -         | -         | -         | -        | -        | -         | -        | -         | -        | -        | 1         | -        | -        |
| <b>White</b>        | <b>8</b>    | 2          | 4          | 6          | -          | 1          | 2          | -         | 1         | -         | -        | -        | -         | -        | -         | -        | -        | -         | -        | -        |
| <b>Yell</b>         | <b>40</b>   | 9          | 22         | 5          | 21         | 10         | 9          | 3         | 1         | -         | -        | -        | -         | -        | -         | -        | -        | -         | -        | -        |
| <b>TOTAL</b>        | <b>1433</b> | <b>435</b> | <b>657</b> | <b>426</b> | <b>657</b> | <b>187</b> | <b>309</b> | <b>42</b> | <b>65</b> | <b>10</b> | <b>2</b> | <b>3</b> | <b>10</b> | <b>2</b> | <b>41</b> | <b>1</b> | <b>1</b> | <b>15</b> | <b>2</b> | <b>1</b> |

574 **Supplemental Table 2:** Association of *PRNP* haplotype frequencies and odds ratio with CWD  
 576 status for Newton County, Arkansas. Haplotypes were derived from unphased sequences of 720  
 578 nucleotides of the *PRNP* gene. Haplotype as indicated by letters were also reported by Brandt et  
 580 al. (2015, 2018), whereas AR\_# indicates a haplotype unique to Arkansas. Listed are total  
 582 numbers (N), relative frequency f(%), and values for deer that tested either CWD-negative (-),  
 CWD-positive (+) or were untested (?). Odds Ratio (OR) reflects relative representation of a  
 haplotype in CWD+ deer, with OR>1 = over-representation and OR<1 = under-representation;  
 SE= standard error, CI= 95% confidence interval, Z(OR)= Z-score and p(OR)= probability.  
**Values in bold are significant.**

| Hap   | Counts |      |      | Frequency (%) |       |       | Odds Ratio  |             |                    |              |             |
|-------|--------|------|------|---------------|-------|-------|-------------|-------------|--------------------|--------------|-------------|
|       | N      | N(-) | N(+) | f%            | f%(-) | f%(+) | OR          | SE          | CI                 | Z(OR)        | p(OR)       |
| A     | 95     | 68   | 27   | 15.1          | 15.7  | 13.8  | 0.86        | 0.25        | [0.53-1.38]        | -0.64        | 0.52        |
| B     | 197    | 124  | 73   | 31.4          | 28.7  | 37.2  | <b>1.47</b> | <b>0.18</b> | <b>[1.03-2.11]</b> | <b>2.13</b>  | <b>0.03</b> |
| C     | 59     | 49   | 10   | 9.39          | 11.3  | 5.1   | <b>0.42</b> | <b>0.36</b> | <b>[0.21-0.85]</b> | <b>-2.42</b> | <b>0.02</b> |
| D     | 158    | 105  | 53   | 25.2          | 24.3  | 27    | 1.15        | 0.20        | [0.79-1.70]        | 0.73         | 0.46        |
| E     | 34     | 23   | 11   | 5.41          | 5.32  | 5.61  | 1.06        | 0.38        | [0.50-2.21]        | 0.15         | 0.88        |
| G     | 65     | 48   | 17   | 10.4          | 11.1  | 8.67  | 0.76        | 0.30        | [0.43-1.35]        | -0.93        | 0.35        |
| I     | -      | -    | -    | -             | -     | -     | -           | -           | -                  | -            | -           |
| J     | 6      | 5    | 1    | 0.96          | 1.16  | 0.51  | 0.44        | 1.10        | [0.05-3.77]        | -0.75        | 0.45        |
| K     | 4      | 3    | 1    | 0.64          | 0.69  | 0.51  | 0.73        | 1.16        | [0.08-7.09]        | -0.27        | 0.79        |
| L     | -      | -    | -    | -             | -     | -     | -           | -           | -                  | -            | -           |
| O     | 3      | 2    | 1    | 0.48          | 0.46  | 0.51  | 1.10        | 1.23        | [0.10-12.23]       | 0.08         | 0.94        |
| P     | -      | -    | -    | -             | -     | -     | -           | -           | -                  | -            | -           |
| R     | -      | -    | -    | -             | -     | -     | -           | -           | -                  | -            | -           |
| T     | 3      | 2    | 1    | 0.48          | 0.46  | 0.51  | 1.10        | 1.23        | [0.10-12.23]       | 0.08         | 0.94        |
| V     | -      | -    | -    | -             | -     | -     | -           | -           | -                  | -            | -           |
| AR_1  | -      | -    | -    | -             | -     | -     | -           | -           | -                  | -            | -           |
| AR_2  | 2      | 2    | -    | 0.32          | 0.46  | -     | -           | -           | -                  | -            | -           |
| AR_3  | 1      | 1    | -    | 0.16          | 0.23  | -     | -           | -           | -                  | -            | -           |
| AR_4  | 1      | -    | 1    | 0.16          | -     | 0.51  | -           | -           | -                  | -            | -           |
| Total | 628    | 432  | 196  |               |       |       |             |             |                    |              |             |

586 **Supplemental Table 3:** *PRNP* haplotype frequencies and odds ratio for six age classes of white-  
588 tailed deer collected in Newton County, Arkansas from 2016-2019. Relative frequencies and  
590 odds ratio are shown for (A) Haplotype C (associated with reduced CWD susceptibility), and (B)  
592 Haplotype B (associated with increased CWD susceptibility). Relative frequency of CWD-  
negative [f(-)] and CWD-positive [f(+)] samples were calculated by dividing numbers CWD(+/-)  
with C or B, respectively, then by negatives w/ other haplotypes.

(A) Haplotype C

| Age          | N  | N(-) | N(+) | f(-) | f(+) | OR   |
|--------------|----|------|------|------|------|------|
| FAWN         | 9  | 8    | 1    | 0.13 | 0.04 | 0.34 |
| Y1           | 5  | 5    | 0    | 0.08 | 0.00 | 0.40 |
| Y2           | 22 | 18   | 4    | 0.15 | 0.08 | 0.53 |
| Y3           | 16 | 13   | 3    | 0.21 | 0.09 | 0.40 |
| Y4           | 4  | 3    | 1    | 0.07 | 0.08 | 1.05 |
| Y5           | 8  | 6    | 2    | 0.19 | 0.17 | 0.89 |
| <b>Total</b> | 64 | 53   | 11   |      |      |      |

594

596 (B) Haplotype B

| Age           | N   | N(-) | N(+) | f(-) | f(+) | OR   |
|---------------|-----|------|------|------|------|------|
| FAWN          | 21  | 14   | 7    | 0.25 | 0.41 | 1.65 |
| Y1            | 26  | 20   | 6    | 0.45 | 0.75 | 1.65 |
| Y2            | 73  | 52   | 21   | 0.58 | 0.60 | 1.04 |
| Y3            | 28  | 15   | 13   | 0.25 | 0.52 | 2.05 |
| Y4            | 23  | 17   | 6    | 0.63 | 0.75 | 1.19 |
| Y5            | 11  | 6    | 5    | 0.19 | 0.56 | 2.96 |
| <b>Total:</b> | 182 | 124  | 58   |      |      |      |

598

600 **Supplemental Table 4:** Modeling results for amino acid variant effect versus three non-  
602 synonymous *PRNP* gene polymorphisms. Results represent: I-MUTANT stability index (where  
604 negative indices destabilize); PROVEAN conservation score (heightened negative value = more  
likely to be deleterious, with -2.5 as a putative neutral cutoff); MutPred2 probability of  
606 pathogenicity (with values >0.8 interpreted as pathogenic); and SIFT conservation score (where  
4.32=completely conserved, and 0.0=completely polymorphic).

| <b>Mutant</b> | <b>I-MUTANT</b> | <b>Method</b>  |                 |             |
|---------------|-----------------|----------------|-----------------|-------------|
|               |                 | <b>PROVEAN</b> | <b>MutPred2</b> | <b>SIFT</b> |
| <b>96S</b>    | -0.37           | -1.250         | 0.366           | 3.88        |
| <b>112T</b>   | -0.27           | -0.937         | 0.446           | 3.88        |
| <b>225K</b>   | 0.13            | -0.743         | 0.425           | 4.32        |

608 **Supplemental Figure 1:** Spatial distribution of 211 non-overlapping polygons in the state of  
610 Arkansas (U.S.A.). Each included 5-10 sampling locations. Closed red and green circles  
612 represent 1,433 white-tailed deer samples employed to compute prion gene variant (*PRNP*  
haplotype) frequencies for interpolation. Red circles = CWD+; green circles = CWD-

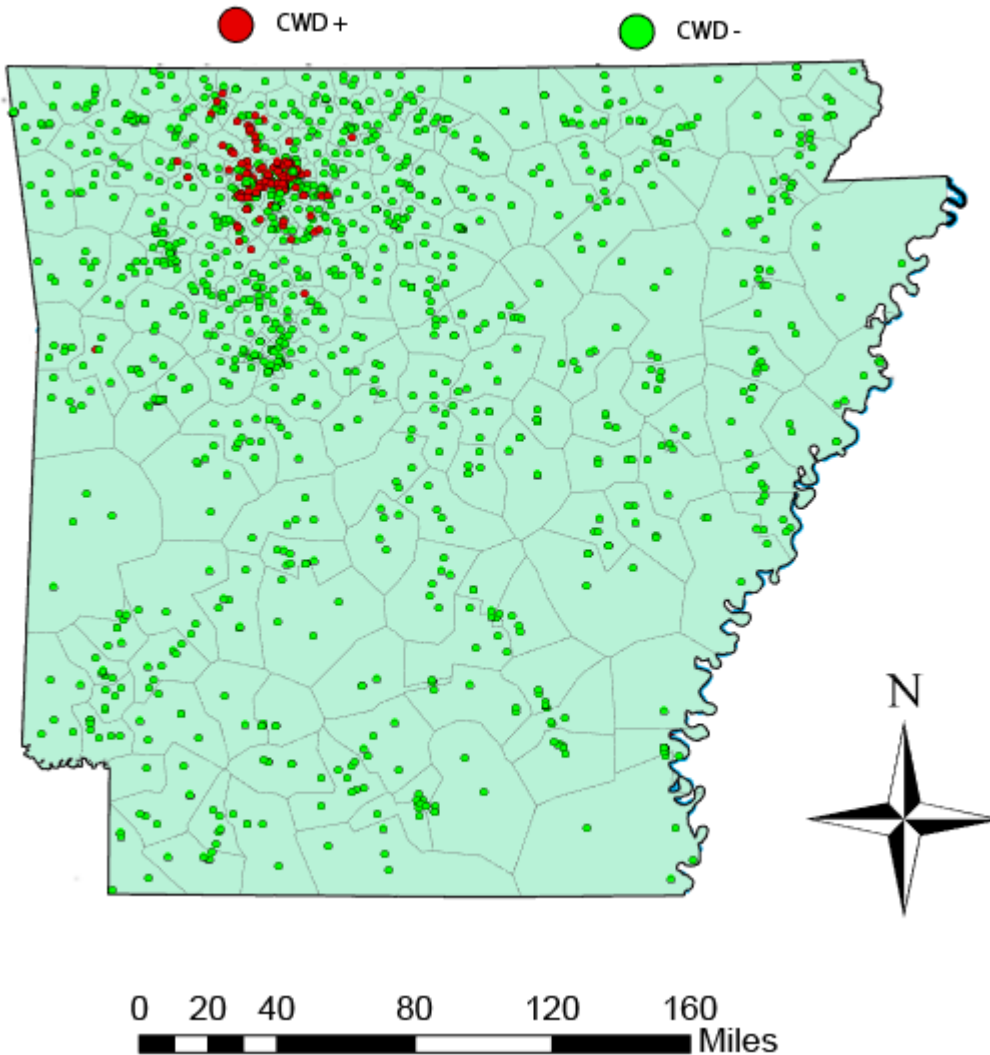

614

616 **Supplemental Figure 2:** Age and sex distribution for  $N=1,433$  white-tailed deer tissue samples for which *PRNP* haplotype data was generated.

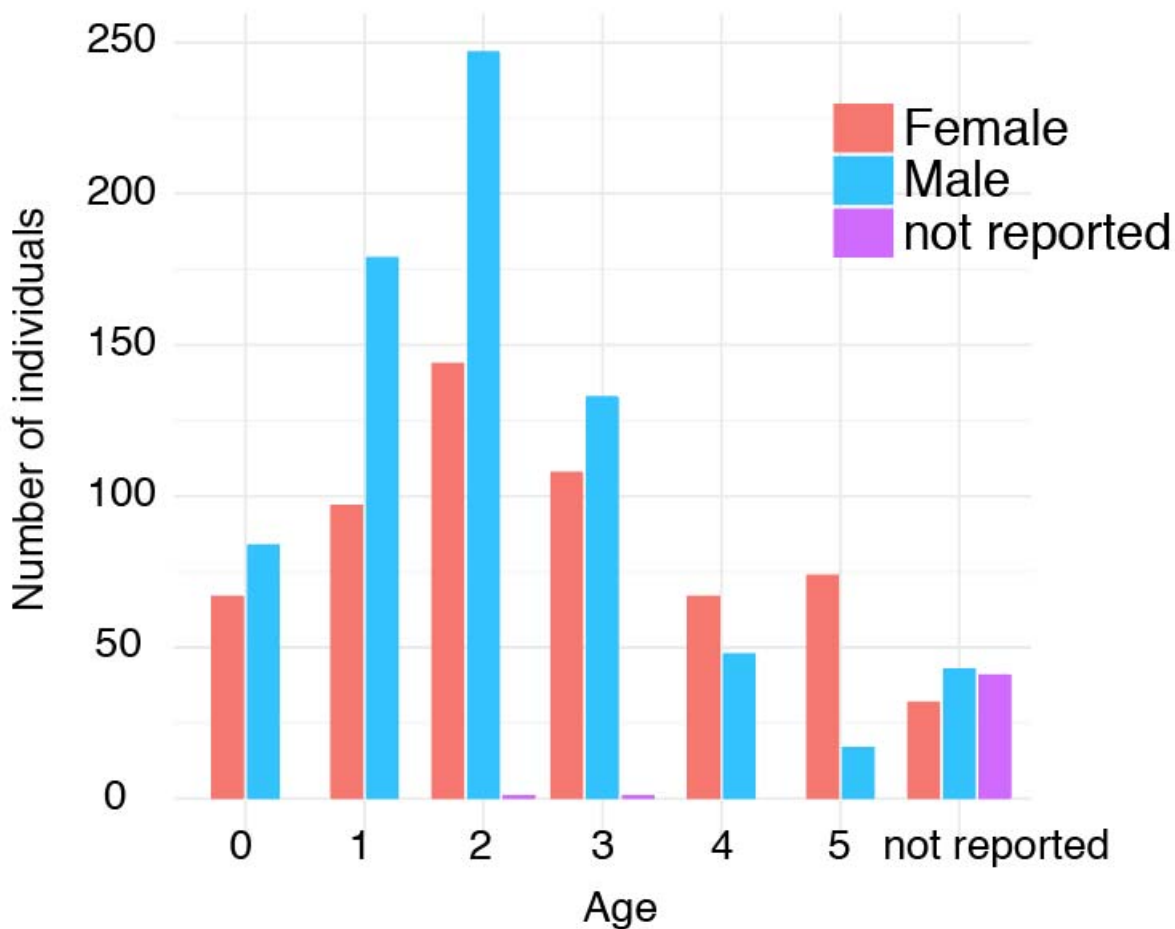

618

620
